# Supplementary material
Source: MDPI journal article supplement (https://www.mdpi.com/2071-1050/16/2/663)
Supplement: s1 [file s1]

# Italian Entertainment Professionals' Sustainable Employability: What Factors to Consider? A Network Analysis

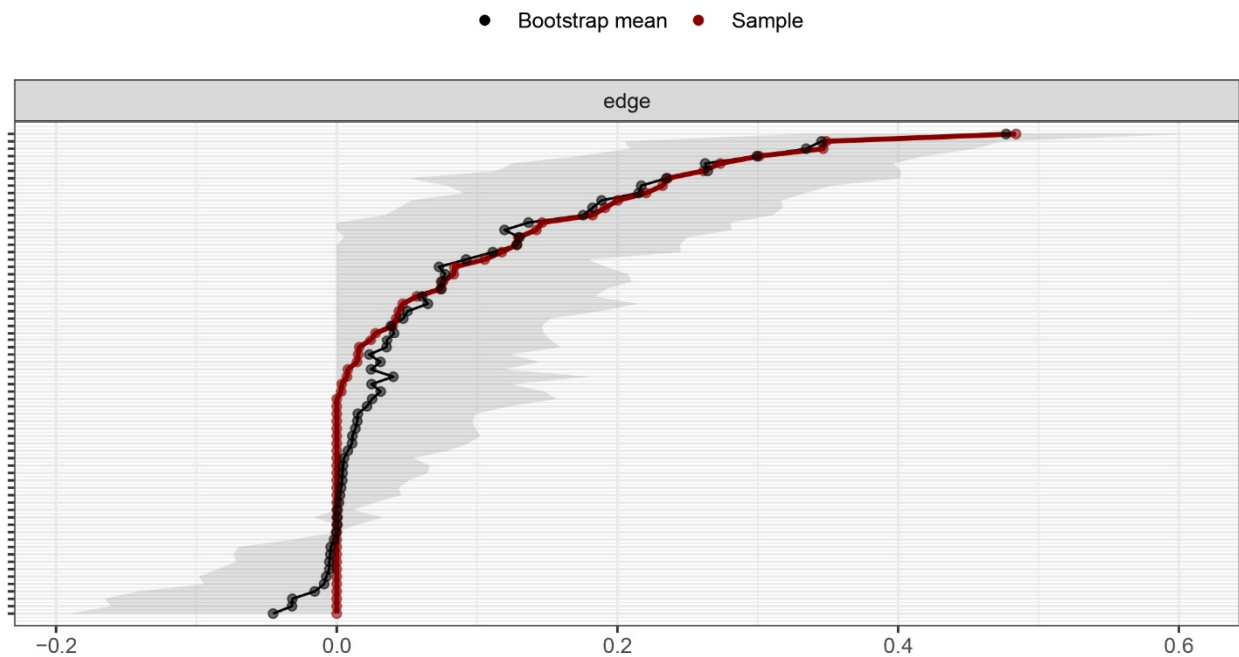

**Figure S1.** Representation of robustness and stability of the SE network for entertainment professionals. Red line represents sample values, shaded area represents bootstrapped 95% intervals, and black line represents average bootstrapped value of edge weights (the strength of unique association between variables). Network edges (each horizontal line) are ordered from the highest edge-weight to the edge with the lowest edge-weight.

# Italian Entertainment Professionals' Sustainable Employability: What Factors to Consider? A Network Analysis

**Table S1.** Quantiles of the bootstraps for each SE network edge.

|    | type | node1    | node2    | id                 | sample  | q2.5    | q97.5 |
|----|------|----------|----------|--------------------|---------|---------|-------|
| 1  | edge | Capab_LP | Perform  | Capab_LP--Perform  | 0.08384 | 0.00000 | 0.192 |
| 2  | edge | Capab_LP | Sodd_Lav | Capab_LP--Sodd_Lav | 0.18229 | 0.03426 | 0.310 |
| 3  | edge | Capab_PC | Capab_LP | Capab_PC--Capab_LP | 0.04700 | 0.00000 | 0.214 |
| 4  | edge | Capab_PC | Capab_VW | Capab_PC--Capab_VW | 0.27324 | 0.12495 | 0.396 |
| 5  | edge | Capab_PC | Sodd_Lav | Capab_PC--Sodd_Lav | 0.11757 | 0.00000 | 0.245 |
| 6  | edge | Capab_S  | Capab_LP | Capab_S--Capab_LP  | 0.20024 | 0.05343 | 0.317 |
| 7  | edge | Capab_S  | Capab_PC | Capab_S--Capab_PC  | 0.30089 | 0.17241 | 0.418 |
| 8  | edge | Capab_S  | Capab_VW | Capab_S--Capab_VW  | 0.08340 | 0.00000 | 0.208 |
| 9  | edge | Capab_S  | Perform  | Capab_S--Perform   | 0.00353 | 0.00000 | 0.124 |
| 10 | edge | Capab_VW | Capab_LP | Capab_VW--Capab_LP | 0.19113 | 0.04398 | 0.318 |
| 11 | edge | Capab_VW | Sodd_Lav | Capab_VW--Sodd_Lav | 0.14629 | 0.00000 | 0.281 |
| 12 | edge | M_intr   | Capab_VW | M_intr--Capab_VW   | 0.34655 | 0.20889 | 0.455 |
| 13 | edge | M_intr   | Sodd_Lav | M_intr--Sodd_Lav   | 0.01607 | 0.00000 | 0.160 |
| 14 | edge | Perform  | Sodd_Lav | Perform--Sodd_Lav  | 0.23571 | 0.05101 | 0.402 |
| 15 | edge | Perform  | Sodd_v   | Perform--Sodd_v    | 0.34875 | 0.20505 | 0.474 |
| 16 | edge | PolSoc   | Capab_LP | PolSoc--Capab_LP   | 0.03978 | 0.00000 | 0.146 |
| 17 | edge | PolSoc   | Capab_S  | PolSoc--Capab_S    | 0.00793 | 0.00000 | 0.119 |
| 18 | edge | PolSoc   | Perform  | PolSoc--Perform    | 0.10542 | 0.00000 | 0.179 |
| 19 | edge | PolSoc   | Sodd_v   | PolSoc--Sodd_v     | 0.01448 | 0.00000 | 0.144 |
| 20 | edge | PolSoc   | WHBes    | PolSoc--WHBes      | 0.07389 | 0.00000 | 0.192 |
| 21 | edge | PolSoc   | WHBhc    | PolSoc--WHBhc      | 0.05707 | 0.00000 | 0.184 |
| 22 | edge | SEPolicy | Capab_LP | SEPolicy--Capab_LP | 0.02425 | 0.00000 | 0.152 |
| 23 | edge | SEPolicy | Capab_S  | SEPolicy--Capab_S  | 0.02763 | 0.00000 | 0.148 |
| 24 | edge | SEPolicy | Perform  | SEPolicy--Perform  | 0.04240 | 0.00000 | 0.152 |
| 25 | edge | SEPolicy | PolSoc   | SEPolicy--PolSoc   | 0.48395 | 0.33034 | 0.604 |
| 26 | edge | SEPolicy | WHBes    | SEPolicy--WHBes    | 0.12933 | 0.00519 | 0.250 |
| 27 | edge | SEPolicy | WHBhc    | SEPolicy--WHBhc    | 0.22040 | 0.09054 | 0.334 |
| 28 | edge | Sodd_Lav | Sodd_v   | Sodd_Lav--Sodd_v   | 0.23217 | 0.07872 | 0.352 |
| 29 | edge | WHBes    | Capab_LP | WHBes--Capab_LP    | 0.07565 | 0.00000 | 0.210 |
| 30 | edge | WHBes    | Capab_S  | WHBes--Capab_S     | 0.12828 | 0.00000 | 0.245 |
| 31 | edge | WHBes    | Capab_VW | WHBes--Capab_VW    | 0.00723 | 0.00000 | 0.180 |
| 32 | edge | WHBhc    | Capab_LP | WHBhc--Capab_LP    | 0.01529 | 0.00000 | 0.123 |
| 33 | edge | WHBhc    | Capab_PC | WHBhc--Capab_PC    | 0.00320 | 0.00000 | 0.148 |
| 34 | edge | WHBhc    | Capab_S  | WHBhc--Capab_S     | 0.14222 | 0.00000 | 0.282 |
| 35 | edge | WHBhc    | Sodd_v   | WHBhc--Sodd_v      | 0.04430 | 0.00000 | 0.188 |
| 36 | edge | WHBhc    | WHBes    | WHBhc--WHBes       | 0.26143 | 0.11426 | 0.402 |

# **Italian Entertainment Professionals' Sustainable Employability: What Factors to Consider? A Network Analysis**

Note. Explanation of variables names: 1. Conversion factors. M\_intr = Intrinsic motivation; SEPolicy = Sustainable Employability policies; PolSoc = Social policies; WHBhc = Work–health balance health climate; WHBes = Work–health balance external support. 2. Sustainable employability. Capab\_S = Health capabilities; Capab\_PC = Productivity capabilities; Capab\_VW = Valuable work capabilities; Capab\_LP = Long-term perspective capabilities; 3. Functioning. Perform = Task performance; Sodd\_v = Job satisfaction; Sodd\_Lav = Life satisfaction.
